# Supplementary material
Source: publisher site journal article supplement (https://www.dovepress.com/article/396979)

*Supplementary Information (ppt)-different phases of the experiment with images*

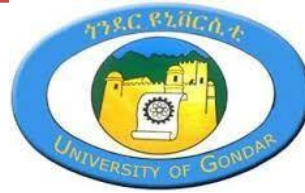

**EFFECTIVENESS OF PROBIOTIC AND COMBINATIONS OF PROBIOTIC  
WITH PREBIOTIC AND PROBIOTIC WITH RUMENOTORIC FOR  
EXPERIMENTALLY INDUCED RUMINAL ACIDOSIS IN SHEEP**

**BY**

**MELKIE DAGNAW**

**Thesis for Partial Fulfillment of the Requirements of the Degree of Master  
of Science in Veterinary clinical medicine**

**GONDAR, ETHIOPIA**

**JUNE, MONDAY 24/06/2019 GC**

# OUTLINES

## ❑ INTRODUCTION

- ❖ Statements of the problem
- ❖ Objective

## ❑ MATERIALS AND METHODS

- ❖ Study animals and Study Area
- ❖ Experimental Design And Period
- ❖ Therapeutically Interventions
- ❖ Data Management

## ❖ RESULTS

## ❖ CONCLUSION AND RECOMMENDATIONS

# INTRODUCTION

- ❑ Small ruminants have been providing socio-economic development in our country.
- ❑ However, the performance of the sheep industry has been poor due to different constraints.
- ❑ Major constraints in sheep involve ruminal acidosis.
- ❑ Therefore, in order to solve this problem;
- ❑ the promising alternative was found by using probiotic and its combinations.

# Statements of the problem

- ❑ Ruminants are important livestock species in developing countries such as Ethiopia.
- ❑ Small ruminants industry constitutes a one of major part of animal production in Ethiopia
- ❑ However; feed deficiency, poor managements and rumen disorders had a great economical loss

# Cont'...

- ❑ The most common rumen disorder is usually ruminal acidosis that arises from ingestion of a large quantity of carbohydrate-rich diet.
- ❑ Generally, dysfunctional rumen results in
  - ❖ impaired digestion
  - ❖ Reduction of production
  - ❖ increased susceptibility digestive and
  - ❖ metabolic diseases

## Con't...

- ❑ Even though there is traditional buffering agents such as;
  - ❖ Magnesium hydroxide
  - ❖ sodium bicarbonate but;
- ❑ There is recent trends to improve the ruminal acidosis.
- ❑ Probiotics, rumenototics, prebiotics and sybiotics
- ❑ In Ethiopia has not done any clinical trial about these agents and not use clinically.
- ❑ Keeping this in view, the study was planned with the following objectives

# General Objective

- ❑ To compare the therapeutic effectiveness probiotics, a combination of probiotics with prebiotics, probiotics with rumenototics and standard treatments of experimentally induced acidosis in sheep

## Specific objective:

- ❖ Evaluate and compare therapeutic effectiveness of alternative treatments.
- ❖ Compare the therapeutic effectiveness of the alternative ruminal acidosis treatments with the standard treatment.



# MATERIALS AND METHODS

## ❑ **Study animals:**

- ❖ Local breed sheep were bought from the same origin and as much as possible equivalent age, body condition and size.

## ❑ **Sample Size:**

- ❖ The total number of animals used for the study was 25 sheep.
  - In each group 5 sheep of equivalent age, body condition and body size were randomly assigned.

# Con't...

- **Experimental Design And Period;**
- Experiment was conducted from December 2019 to may 2019
- to evaluate and compare the therapeutic effectiveness of Probiotic and its combination comparing with standard treatment.
- The experimental design was a completely randomized design

# Experimental Data Collection

- ❑ General physical examination was taken before and after treatment (HR,RR,To)
- ❑ Evaluation of haematological, serum and ruminal Changes
  - ❖ Determination of blood parameters (pH,PCV,Hgb)
  - ❖ rumen fluid analysis (pH,protozoal motility,MBRT and SAT)
  - ❖ Serum analysis( total protein albumin, AST and ALP)

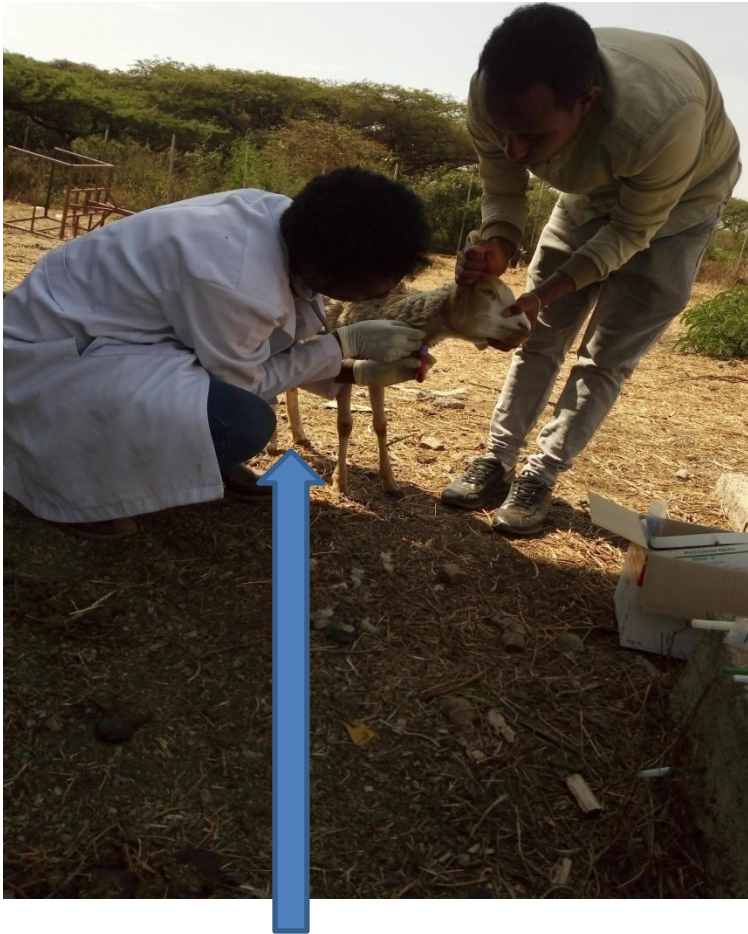

**Bloodcollection**

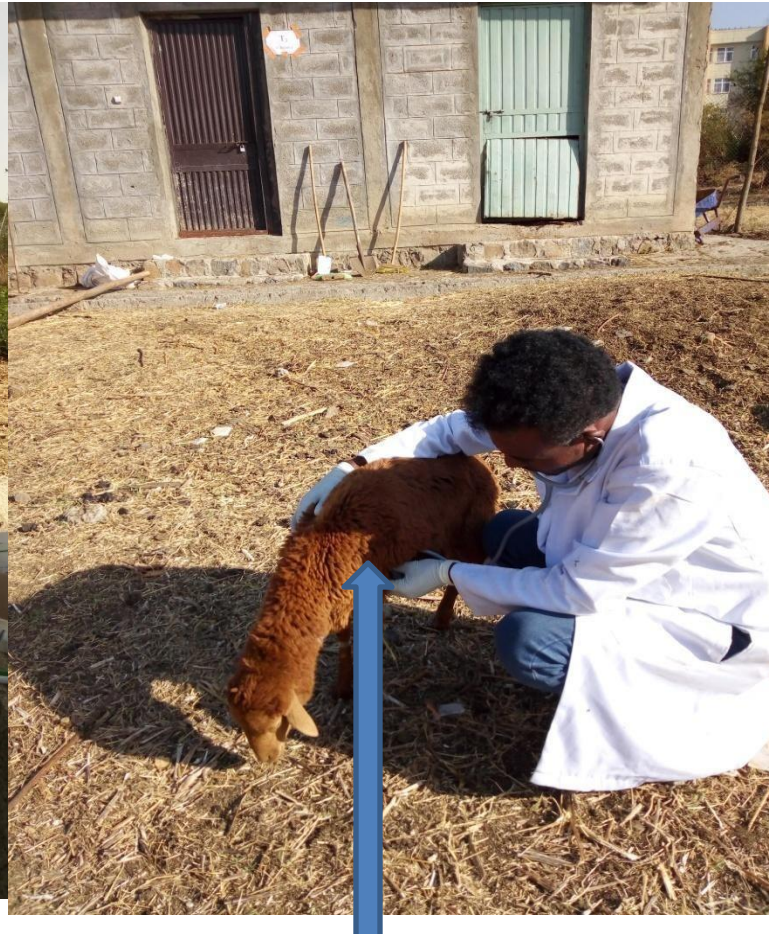

**Measure heart rate**

# Con't...

## Body temperature

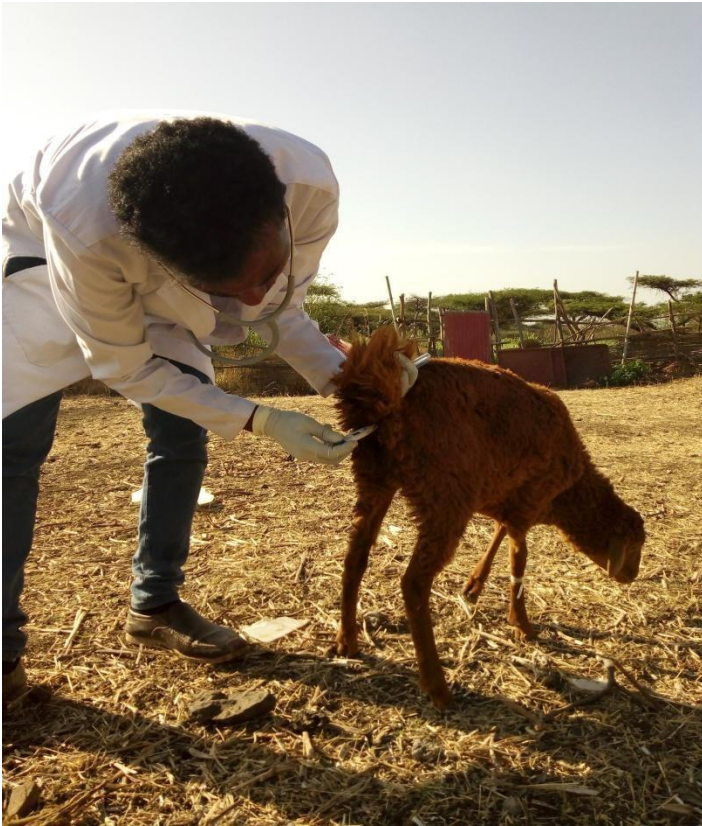

## Ruminal fluid collection

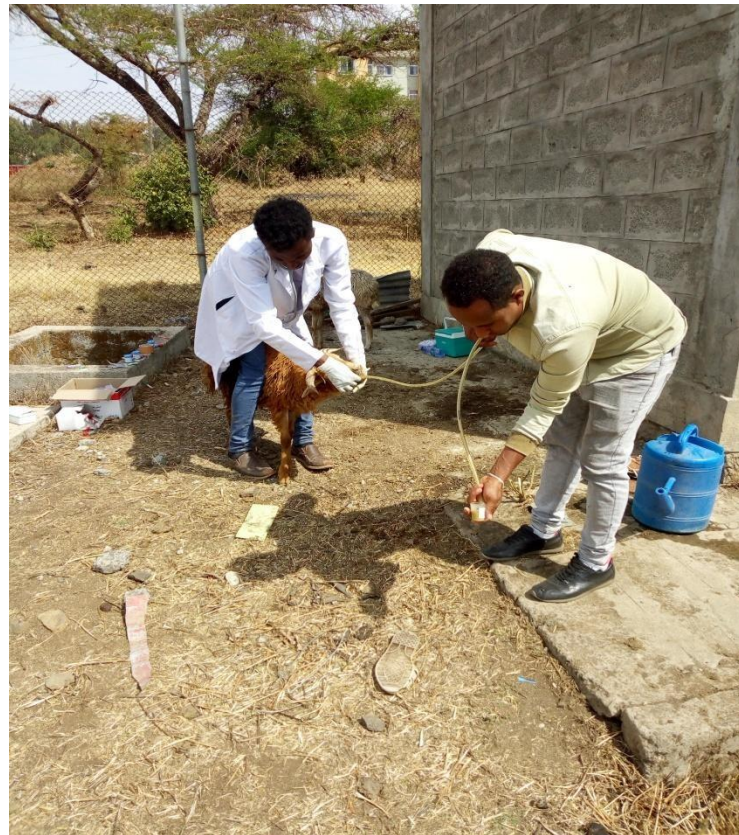

# Therapeutical interventions

- ❑ For experimental therapeutic study 25 sheep was randomly divided into five groups(GC, PT,PPT, PRT AND ST).
- ❑ Each group comprises 5 animals
- ❑ Then, oral dose of 50g/kg with wheat flour after 24 hour fasting was allowed.
- ❑ Subsequently, ruminal acidosis was induced successfully

**Con't...**

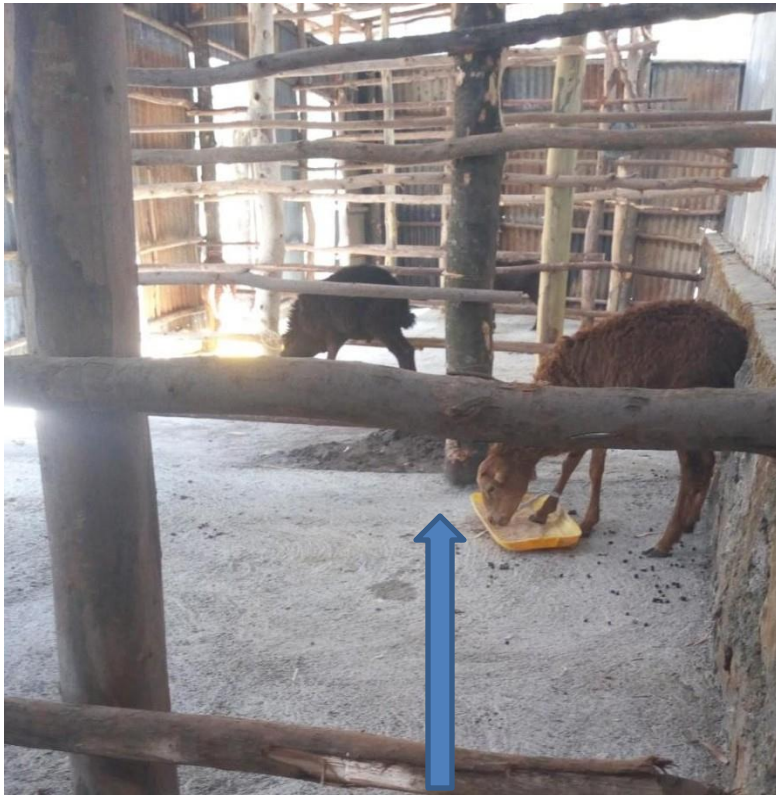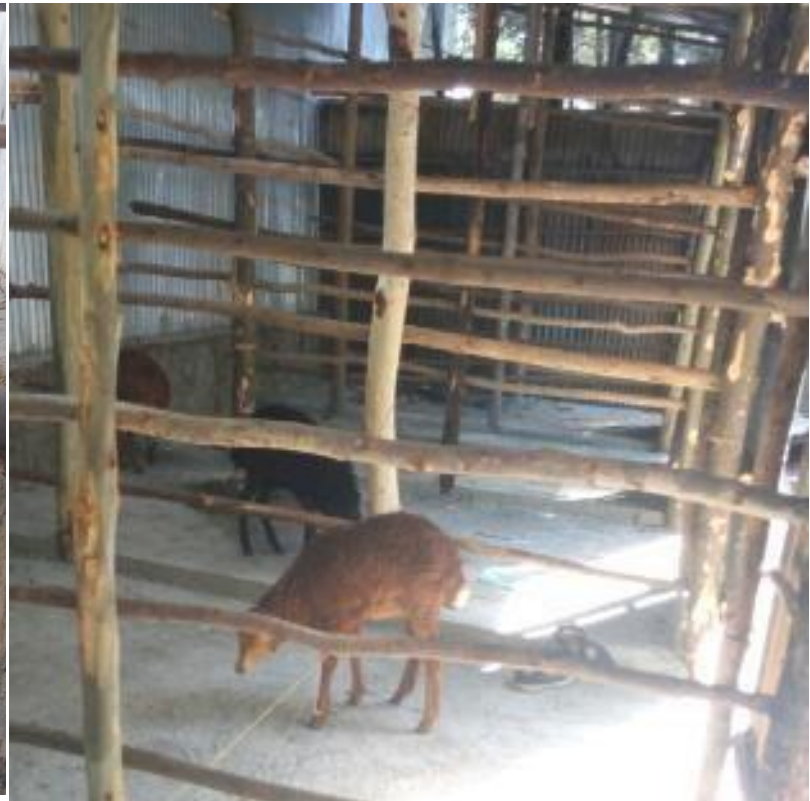

**Induction phase**

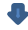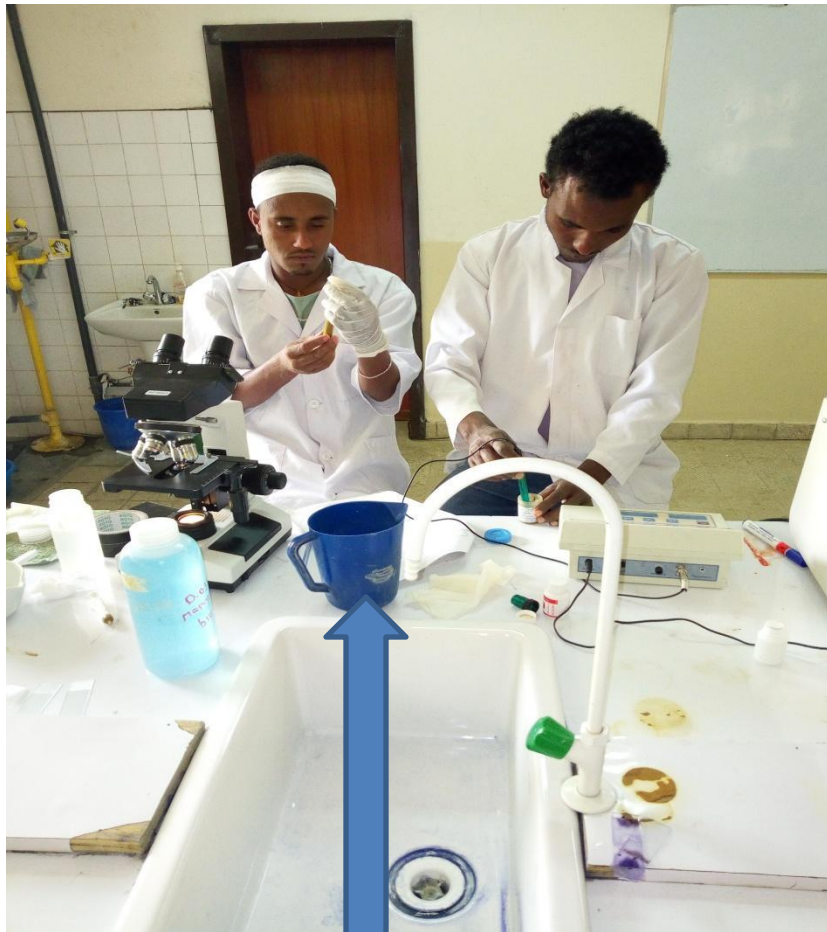

**Ruminal pH**

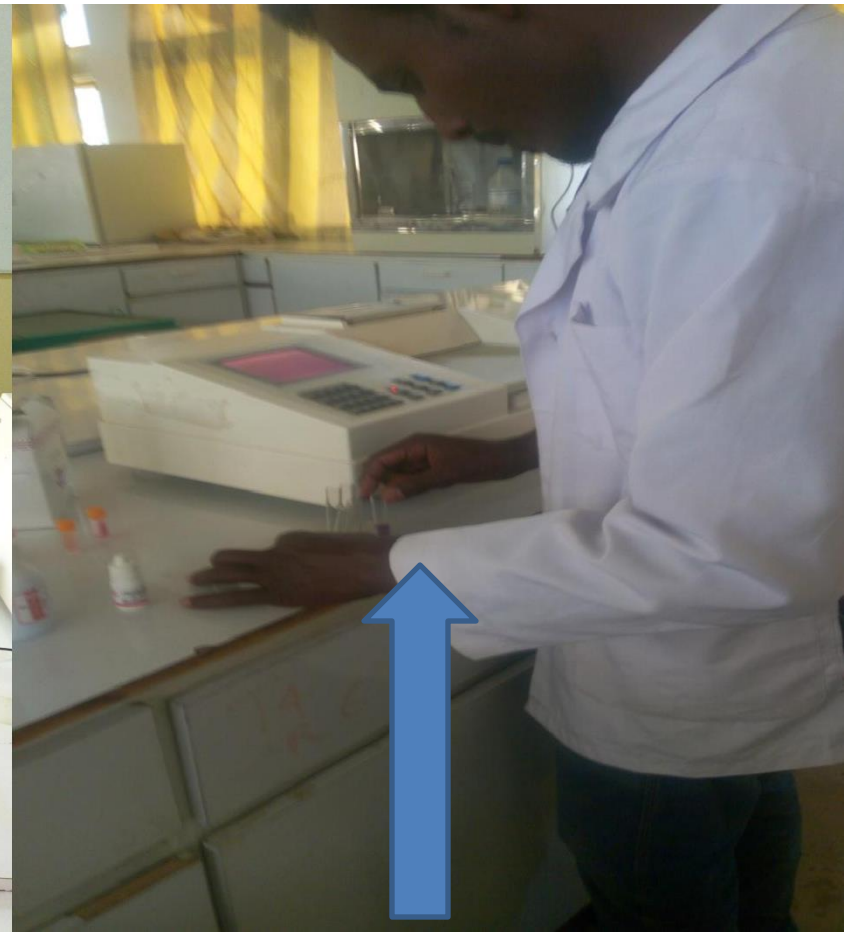

**Serum analysis**



## Con't...

- ❑ Then four different types of treatments were allocated randomly to four groups.
- ❑ To ascertain the comparative efficacy of various regimens
- ❑ by comparing with positive control group and within group.
- ❑ For assessing ameliorative potential of probiotics, prebiotics and their combinations.

| Treatments groups       | Composition                                                                      | Dose         | Company   | Country | Route | Duration |
|-------------------------|----------------------------------------------------------------------------------|--------------|-----------|---------|-------|----------|
| Probiotic alone         | Saccharomyces spp                                                                | 1gram        | IndiaMART | India   | Oral  | 3 days   |
|                         | Bifidobacterium spp                                                              |              |           |         |       |          |
| Probiotic & Prebiotic   | Saccharomyces spp                                                                | 1gram        | IndiaMART | India   | Oral  | 3 days   |
|                         | Bifidobacterium spp                                                              |              |           |         |       |          |
|                         | FructoOligoSacchride                                                             | 100 miligarm |           |         |       |          |
| Probiotic & Rumenotonic | Saccharomyces spp                                                                | 1gram        | IndiaMART | India   | Oral  | 3 days   |
|                         | Bifidobacterium spp                                                              |              |           |         |       |          |
|                         | AntimonyPotassiumtartarate<br>ferrous sulphate, Copper sulphate, cobalt chloride | 1 bolib.i.d  |           |         |       |          |
| Sodium bicarbonate      | NaHco <sub>3</sub>                                                               | 1g/kg        | ----      | China   | Oral  | 3 day    |

# Statistical Analysis

- ❖ The data was analyzed statistically
- ❖ MANOVA
- ❖ protozoan motility was measured median ( $Q_0$  -  $Q_3$ ) and Kruskal-Wallis equality-of-populations rank test.
- ❖ For statistical inference with  $P\text{-value} < 0.05$  (at 5% level of significance)

# RESULTS

## ❑ **Health Status of the Animals**

- ❖ acidosis was successfully induced and showed common symptoms as usual.
  - nervous depression
  - Watery and acidic smelling diarrhea
  - cessation of feed intake
  - Tooth grinding was showed

# Comparison of mortality rate

- ❑ The results of the present study revealed that most of the therapeutic regimens were effective in eliciting a favorable response in acidosis sheep.
- ❑ Except one sheep died from five (20%) from the treatment I (probiotics alone) (PT)
- ❑ no death due to induced acidosis in the treatment groups as compared to the death of two sheep (40%) in the control group(CG).
- ❑ Effect of various treatment regimens on different parameters are summarized depicted in the next table.

| Parameter              | Time of Rx              | Control group           | Treatment I (DT)         | Treatment II (DDT)       | Treatment III (DDT)      | Treatment IV (ST)        | Total mean   |
|------------------------|-------------------------|-------------------------|--------------------------|--------------------------|--------------------------|--------------------------|--------------|
| Heart rate             | Before                  | 134.40±9.21             | 142.40±10.88             | 140.80±14.45             | 142.80±8.67              | 138.8±7.16               | 139.84±9.29  |
|                        | After (R <sub>x</sub> ) |                         |                          |                          |                          |                          |              |
|                        | Day1                    | 138.00±8.72             | 127.20±7.16              | 123.20±8.67              | 128.20±126 <sup>#</sup>  | 116.40±4.6               | 127±0.20     |
|                        | Day2                    | 124.00±6.93             | 116.00±8.64              | 104.80±5.23 <sup>#</sup> | 108.8±7.64 <sup>#</sup>  | 102.40±4.6 <sup>#</sup>  | 109±9.540    |
|                        | Day3                    | 112.67±3.05             | 107.00±8.87 <sup>#</sup> | 97.20±6.88 <sup>#</sup>  | 91.20±7.69 <sup>#</sup>  | 98.00±8.00 <sup>#</sup>  | 98.27±8.49   |
| Temperature            | Before                  | 38.40±8.764             | 38.00±.707               | 37.60±548                | 37.40±.548               | 38.20±.447               | 37.9± 0.612  |
|                        | (To)                    | After (R <sub>x</sub> ) |                          |                          |                          |                          |              |
|                        | Day1                    | 38.60±.89               | 38.20±.837               | 38.00±.707               | 38.80±.447 <sup>#</sup>  | 39.20±1.05 <sup>#</sup>  | 38.36±0.97   |
|                        | Day2                    | 38.60±.000              | 39.00±.000               | 38.40±548                | 39.40±.548               | 39.20±.837 <sup>#</sup>  | 39.00±0.67   |
|                        | Day3                    | 38.80±000               | 39.00±39.00              | 39.00±.000               | 40.00±.000 <sup>#</sup>  | 39.80±0.55 <sup>#</sup>  | 40±0.00      |
| Respiratory rate((min) | Before                  | 40.40±8.764             | 35.2±3.347               | 33.60±8.295              | 44.00±.5.66              | 31.60±8.52               | 36.96±8.05   |
|                        | After(Rx)               |                         |                          |                          |                          |                          |              |
|                        | Day1                    | 33.60±7.266             | 30.40±4.561              | 25.60±4.561              | 26.00±4.472 <sup>#</sup> | 24.40±2.966 <sup>#</sup> | 28±5.745     |
|                        | Day2                    | 28.67±1.16              | 24.00±3.266              | 23.20±3.347 <sup>#</sup> | 20.80±3.37 <sup>#</sup>  | 20.40±2.96               | 26.00±0.18   |
|                        | Day3                    | 22.67±5.03              | 22.00±2.309              | 19.60±2.966 <sup>#</sup> | 16.80±1.05 <sup>#</sup>  | 17.20±2.63 <sup>#</sup>  | 19.27 ±3.147 |

From this table we can deduce that

| parameter | Date of improvement                                | Treatment group        |
|-----------|----------------------------------------------------|------------------------|
| HR        | 1 <sup>st</sup> ,2 <sup>nd</sup> , 3 <sup>rd</sup> | III and IV(PRT and ST) |
|           | 1 <sup>st</sup> ,2 <sup>nd</sup> ,                 | II(PPT)                |
|           | 2 <sup>nd</sup> ,&3 <sup>rd</sup>                  | I(PT)                  |
| T0        | 2 <sup>nd</sup> & 3 <sup>rd</sup>                  | III(PRT)               |
|           | 1 <sup>st</sup> ,2 <sup>nd</sup> , 3 <sup>rd</sup> | IV(PRT)                |
| RR        | 1 <sup>st</sup> ,2 <sup>nd</sup> , 3 <sup>rd</sup> | III(PPT)               |
|           | 1 <sup>st</sup> ,&3 <sup>rd</sup>                  | IV(ST)                 |
|           | 2 <sup>nd</sup> ,&3 <sup>rd</sup>                  | II                     |

*Values expressed as (#)superscript are significantly significant between control groups at p<0.05. Values were expressed by means ±SD paired t-test before and after treatment by STATA version14*

*One way ANOVA followed by Bonferroni post hoc test was used to compare between groups*

# Effect of various treatment regimens on hematological parameters on acidotic sheep (mean±SD)

| Parameter  |  |                         | Control group | Treatment I(PT)             | Treatment II(PPT)              | Treatment III(PRT)              | Treatment IV(ST)               |
|------------|--|-------------------------|---------------|-----------------------------|--------------------------------|---------------------------------|--------------------------------|
| Blood pH   |  | Before                  | 6.20±0.447    | 6.60±.548                   | 6.20±.447                      | 6.60±.548                       | 6.40±.48                       |
|            |  | After (R <sub>x</sub> ) |               |                             |                                |                                 |                                |
|            |  | Day1                    | 6.40±0.548    | 6.59±.648                   | 6.60±.548                      | 6.80±.447                       | <b>7.40±.548<sup>#</sup></b>   |
|            |  | Day2                    | 6.00±0.00     | <b>7.00±.00<sup>#</sup></b> | 6.68±.547                      | <b>7.100±.100<sup>#</sup></b>   | <b>7.480±.447<sup>#</sup></b>  |
|            |  | Day3                    | 6.67±.577     | 7.00±00                     | <b>7.00±00<sup>#</sup></b>     | <b>7.50±00<sup>#</sup></b>      | <b>7.57±.577<sup>#</sup></b>   |
| PCV        |  | Before                  | 44.00±4.183   | 42.00±5.7                   | 41.80±3.768                    | 38.00±6.819                     | 44.20±2.387                    |
| (%)        |  | After (R <sub>x</sub> ) |               |                             |                                |                                 |                                |
|            |  | Day1                    | 43.20±3.70    | 39.00±3.742                 | <b>37.40±2.88<sup>#</sup></b>  | <b>34.60±5.367<sup>#</sup></b>  | 42.00±2.345                    |
|            |  | Day2                    | 39.00±1.00    | 37.25±4.272                 | 35.60±1.881                    | <b>29.80±6.261<sup>#</sup></b>  | <b>39.80±1.483<sup>#</sup></b> |
|            |  | Day3                    | 35.55±7.12    | 33.00±3.559                 | <b>29.40± 2.99<sup>#</sup></b> | <b>24.80±10.134<sup>#</sup></b> | <b>37.80±1.789<sup>#</sup></b> |
| hemoglobin |  | Before                  | 15.40±1.67    | 14.00±2.000                 | 15.80±.447                     | 12.80 ±1.92                     | 14.40±1.517                    |
| (gm/dl)    |  | After (R <sub>x</sub> ) |               |                             |                                |                                 |                                |
|            |  | Day1                    | 14.80±2.168   | 13.20±2.168                 | 14.5±.707                      | 12.10 ± 2.19                    | 13.80±1.78                     |
|            |  | Day2                    | 13.00±1.000   | 12.00±2.168                 | 11.40±.548                     | <b>11.40±1.817<sup>#</sup></b>  | 13.20±1.095                    |
|            |  | Day3                    | 12.67±.577    | 11.50±1.732                 | <b>11.10±0.89<sup>#</sup></b>  | <b>11.00±2.121<sup>#</sup></b>  | 13.00±1.000                    |



# Effect of various treatment regimens on of rumen liquor experimental induced acidosis in Sheep

| Parameter     | Time of Rx              | Control group(GC) | Treatment I(PT)  | Treatment II (PPT)               | Treatment III (PRT)              | Treatment IV (ST)                 |
|---------------|-------------------------|-------------------|------------------|----------------------------------|----------------------------------|-----------------------------------|
| Ruminal (pH)  | Before                  | 4.40±.54          | 4.80±.46188      | 5.00. ±447                       | 4.96±.837                        | 4.97±.637                         |
|               | After (R <sub>x</sub> ) |                   |                  |                                  |                                  |                                   |
|               | Day1                    | 4.96±.43          | 5.04±.27         | 5.18±.31                         | <b>5.92±.54<sup>#</sup></b>      | 5.38±.540                         |
|               | Day2                    | 5.31±.53          | 5.19±.33         | 5.380±.23                        | <b>6.30±.41<sup>#</sup></b>      | <b>5.85±.540<sup>#</sup></b>      |
|               | Day3                    | 5.4333±.4934      | 5.50±.216        | <b>5.880±.19<sup>#</sup></b>     | <b>6.75±0.34<sup>#</sup></b>     | <b>6.42±.570<sup>#</sup></b>      |
| protozoan     | Before                  | 0.00*(0.-00)      | 0.00*(0-00)      | 0.00*(0-1.00)                    | 0.00*(0-00)                      | 0.0*(0 -00)                       |
| Motility test | After (R <sub>x</sub> ) |                   |                  |                                  |                                  |                                   |
|               | Day1                    | 0.00*(0 -1.00)    | 0.00*(0 -2.00)   | 1.00*(0-2.00)                    | 2.0*(0-2.00)                     | 1.00*(0 -1.00)                    |
|               | Day2                    | 1.00(1.0-1.00)    | 1.00*(0-1.00)    | 1.00*(1-2.00)                    | <b>2.0*(2-3.00) <sup>#</sup></b> | 1.00*(1-1.00)                     |
|               | Day3                    | 1.00*(1 -2.00)    | 1.50*(1.00-3.00) | <b>1.00*(1 -300)<sup>#</sup></b> | <b>3.0*(2-3.0) <sup>#</sup></b>  | <b>2.00*(2-3.00) <sup>#</sup></b> |
| MBRT          | Before                  | 10.33±1.528       | 9.25±1.708       | 9.40±2.966                       | 9.40±2.302                       | 10.20±1.643                       |
| (min)         | After (R <sub>x</sub> ) | 9.67±1.528        | 8.25±1.708       | 7.60±1.51                        | <b>4.60±3.507<sup>#</sup></b>    | <b>6.40±1.673<sup>#</sup></b>     |
| SAT           | Before                  | 1.33±.577         | 1.50±.577        | 1.40±.548                        | 1.60±.894)                       | 1.20±.447                         |

mean ruminal pH between treatment groups for three consecutive days

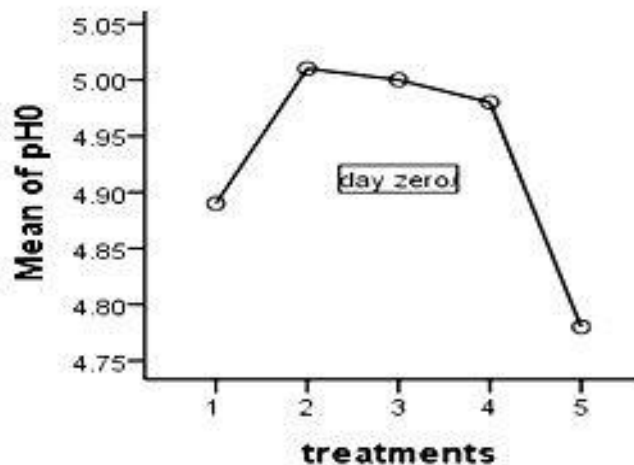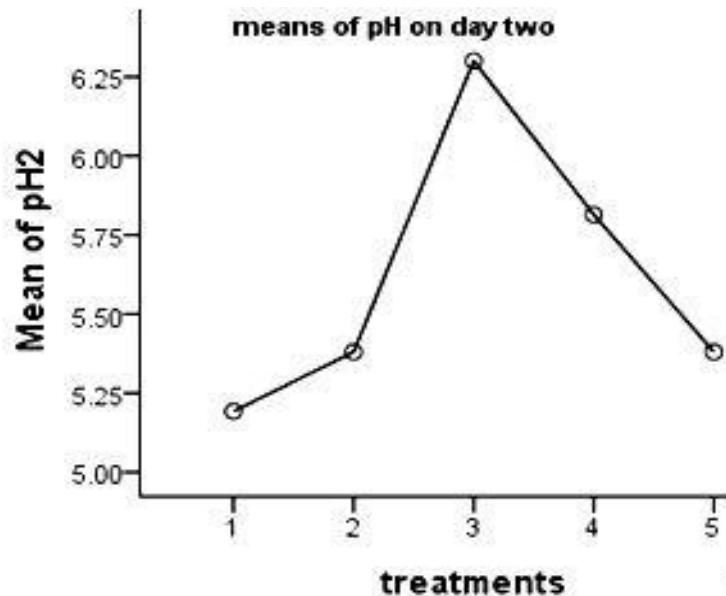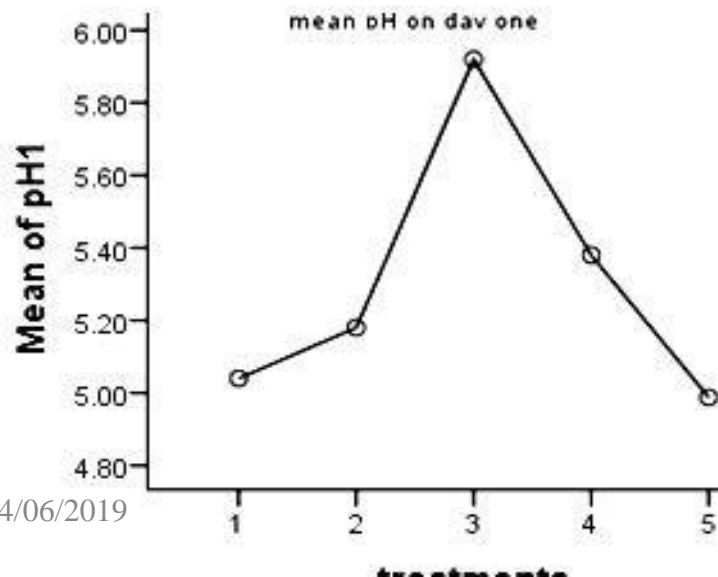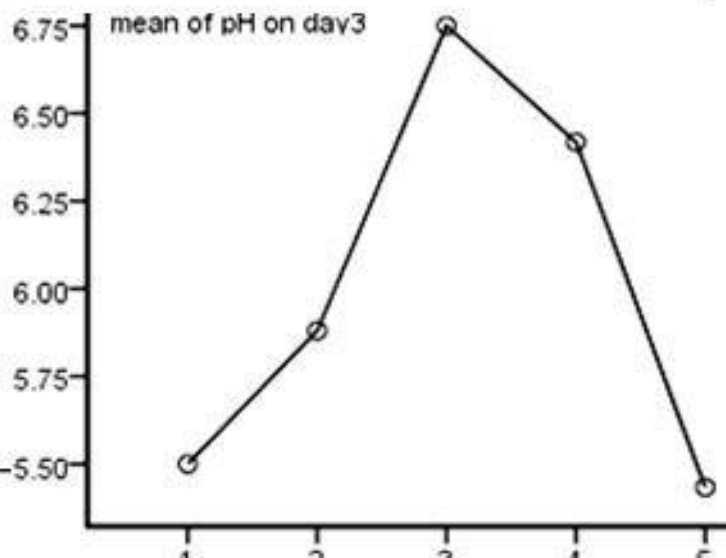

# CONCLUSION

- ❑ Ruminant acidosis is the long standing problem in our country
- ❑ For resolving this problem many traditional buffers have been used.
- ❑ More importantly, in this study the better promising alternative was studied.
- ❑ To start with, experiments were conducted on the proper model, sheep, for inducing ruminant acidosis
- ❑ the adopted model was successfully induced acute rumen acidosis

# Con't

...

- ❑ For this treatment probiotics and standard treatment were provided
- ❑ Therefore, from the present experimental study it has been found that probiotics with rumenototics and standard treatment has provided better therapeutic modality.
- ❑ The present work could be a guide to veterinary professionals for amelioration of rumen acidosis

# RECOMMENDATIONS

- The following recommendations were forwarded
  - ❖ To treat acidosis in ruminant animals bacterial probiotics and yeast probiotics along with rumenototics should be recommended
  - ❖ During treatment of acidosis with common standard antacid treatment, other supplements should be recommended
  - ❖ Probiotics should be recommended preferably for long therapeutic periods
  - ❖ Further, study should be conducted particularly about bacterial

# Thank you

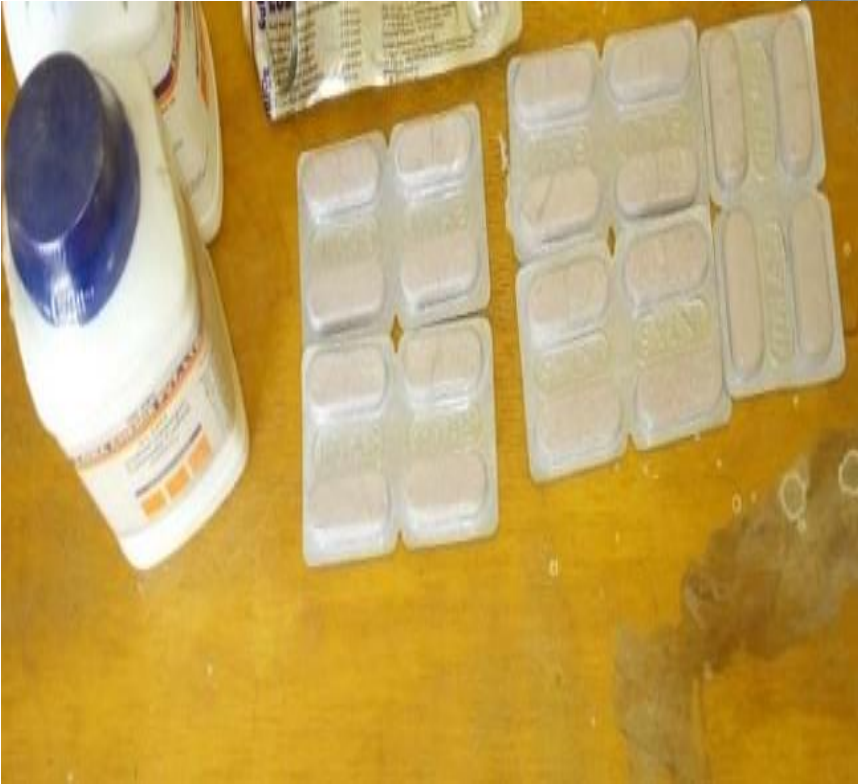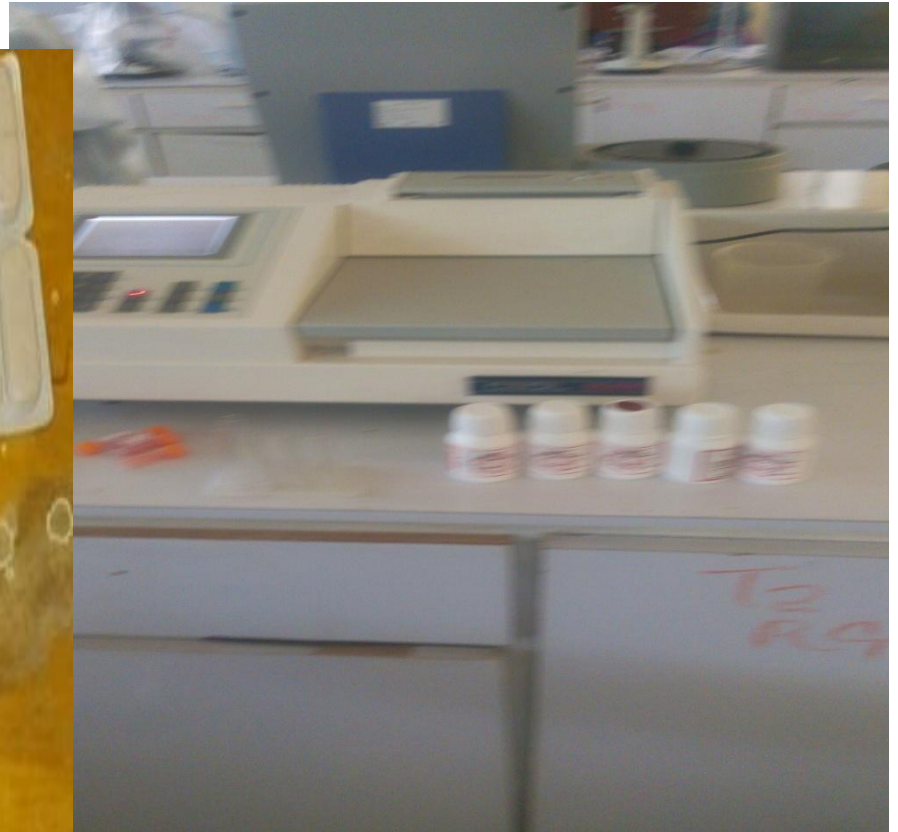

Supplement: Supplementary file 1 [file get_supplementary_file.php]
